# Supplementary material
Source: publisher site journal article supplement (https://www.dovepress.com/article/416155)

A

FDR  $\leq$  0.05 FDR > 0.05

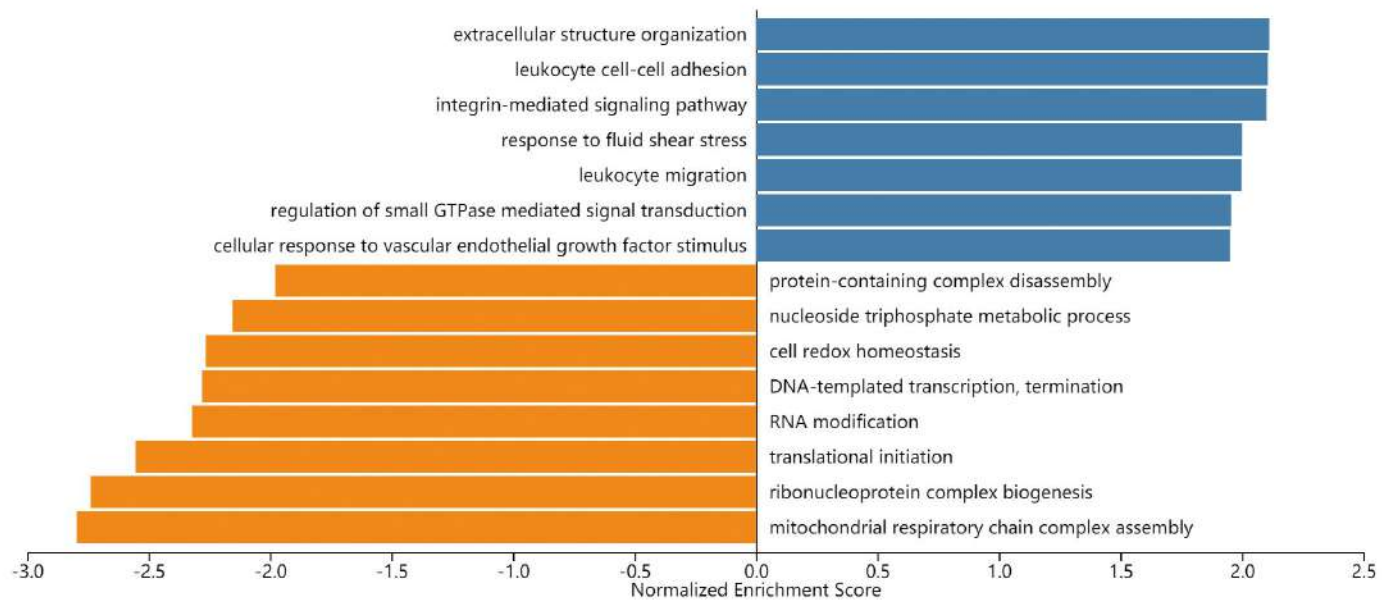

B

FDR  $\leq$  0.05 FDR > 0.05

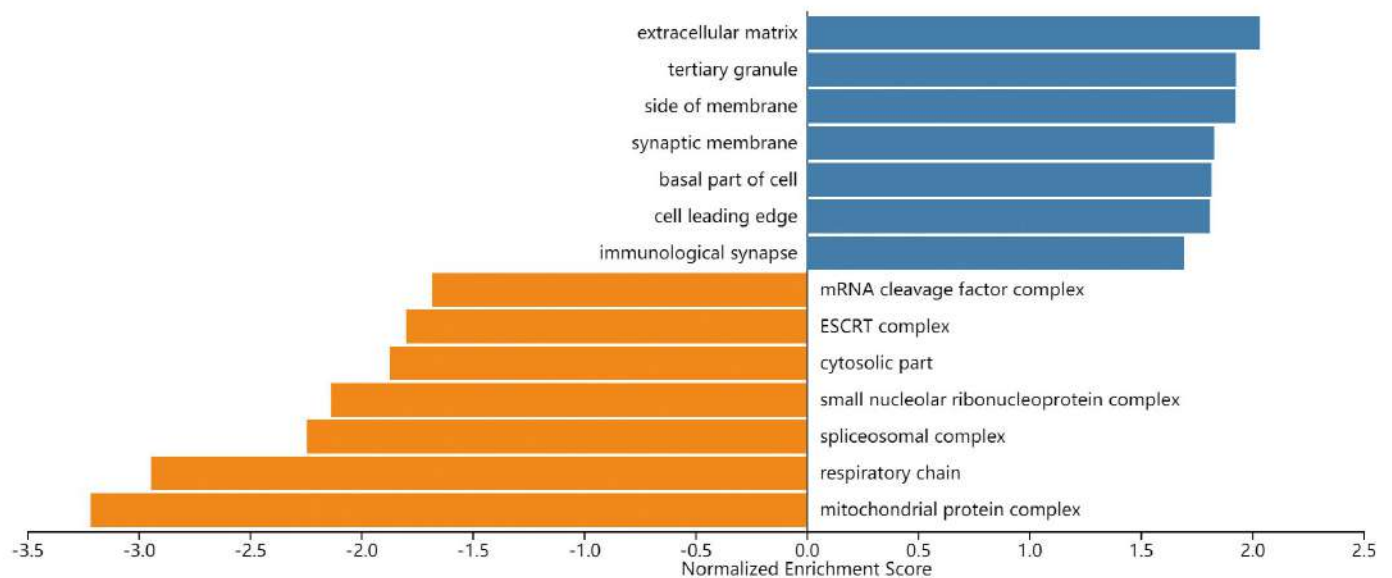

C

FDR  $\leq$  0.05 FDR > 0.05

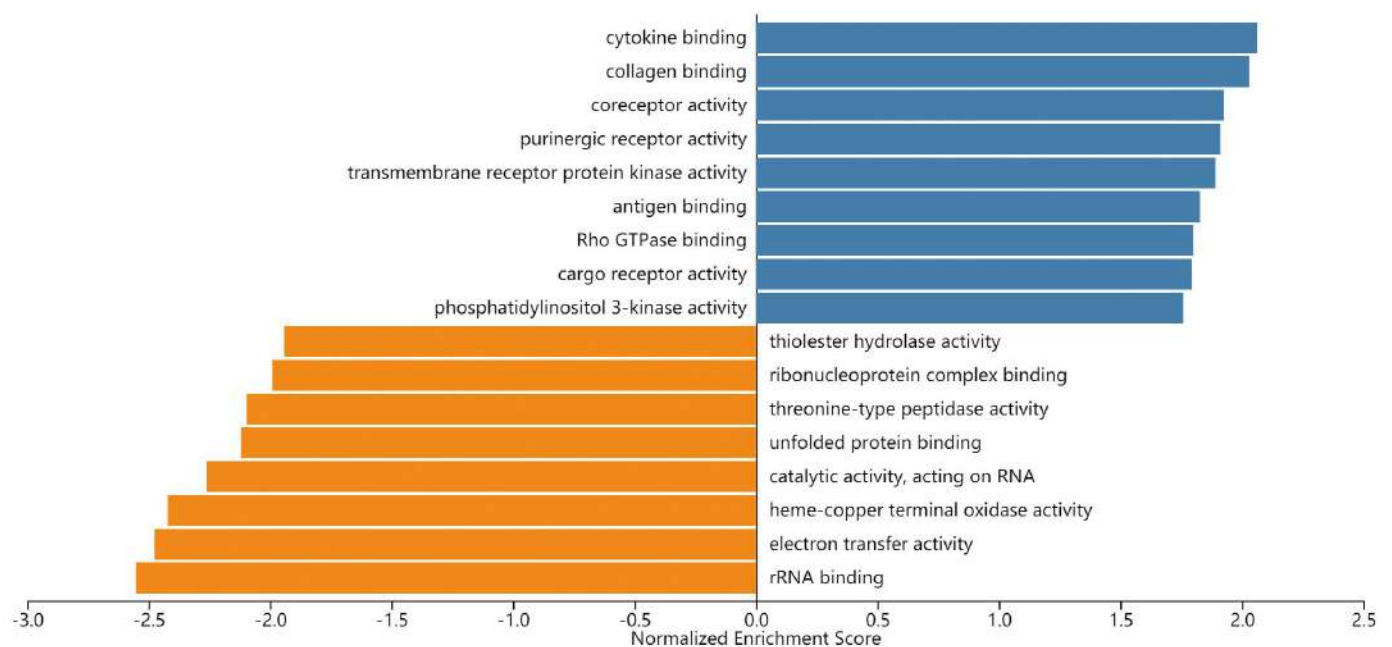

Supplement: Supplementary file 1 [file get_supplementary_file.php]
